# Supplementary material
Source: HighWire-hosted journal article supplement (https://bjsm.bmj.com/content/58/24/1527)

Appendix 9. Forest plots showing the individual study and pooled association of occupational and leisure-time physical activity with all-cause mortality. We report individual study effect sizes (HR with 95% confidence interval), their weight in the pooled effect size, and the pooled effect size (i.e., diamonds).

Forest plot showing the association of low versus sedentary occupational physical activity with all-cause mortality among males from model 3 (adjusted for leisure-time physical activity, age, BMI, smoking and education level).

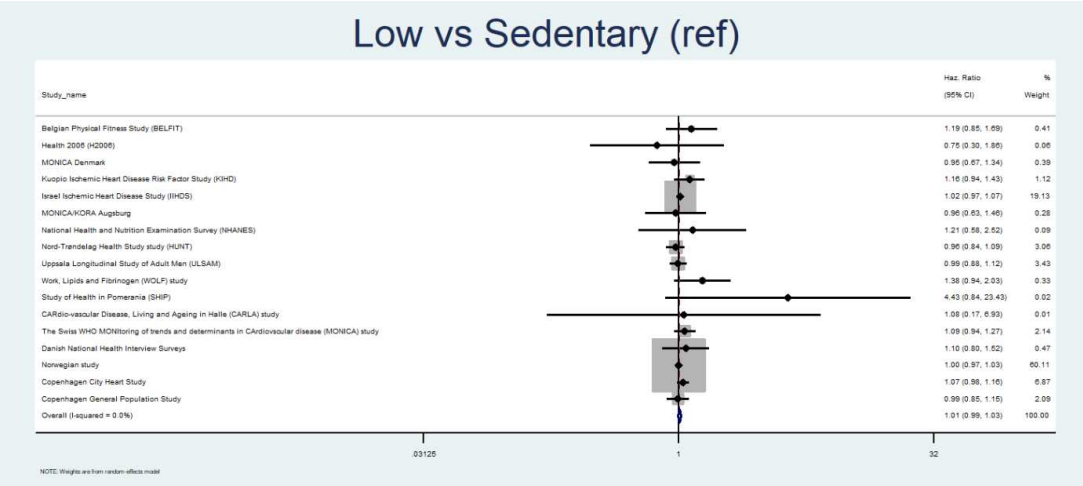

Forest plot showing the association of moderate versus sedentary occupational physical activity with all-cause mortality among males from model 3 (adjusted for leisure-time physical activity, age, BMI, smoking and education level).

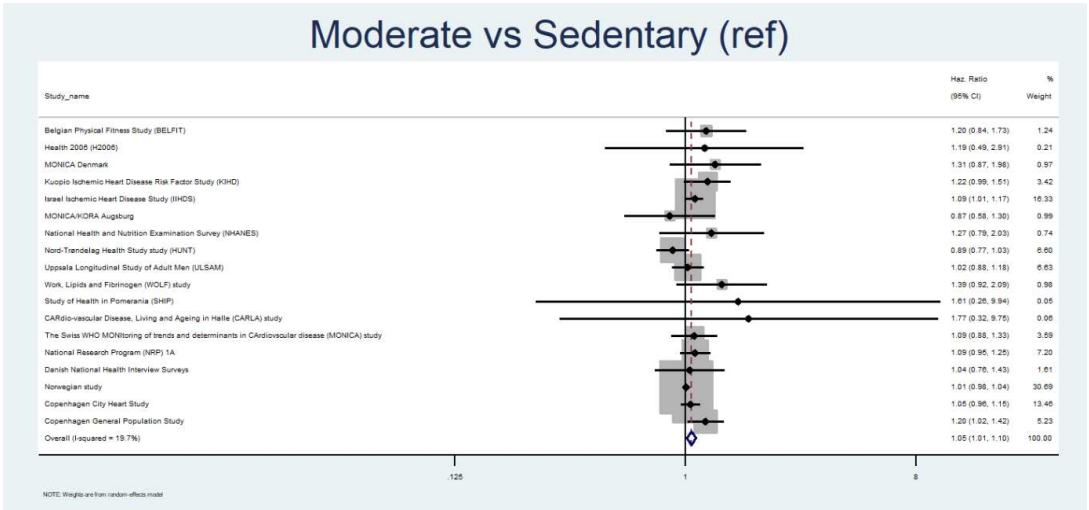

Forest plot showing the association of high versus sedentary occupational physical activity with all-cause mortality among males from model 3 (adjusted for leisure-time physical activity, age, BMI, smoking and education level) .

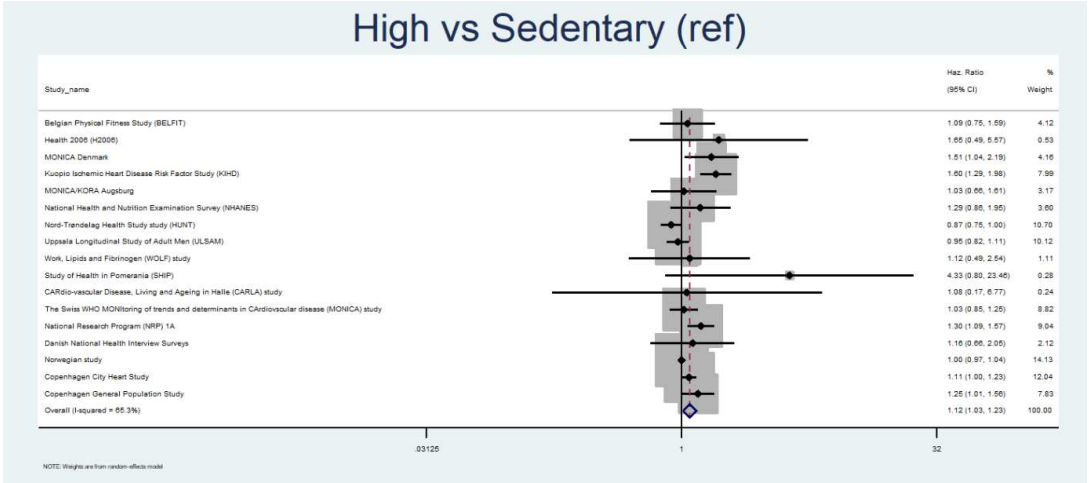

Forest plot showing the association of low versus sedentary occupational physical activity with all-cause mortality among females from model 3 (adjusted for leisure-time physical activity, age, BMI, smoking and education level).

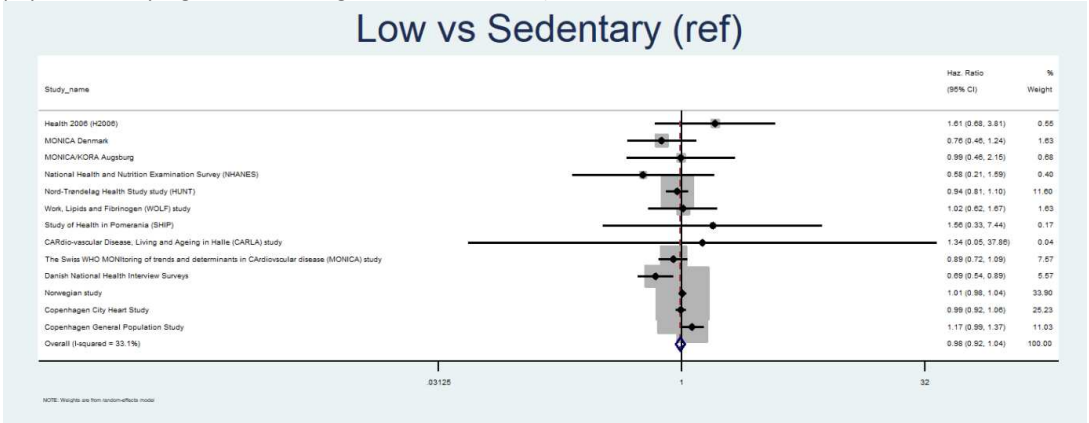

Forest plot showing the association of moderate versus sedentary occupational physical activity with all-cause mortality among females from model 3 (adjusted for leisure-time physical activity, age, BMI, smoking and education level).

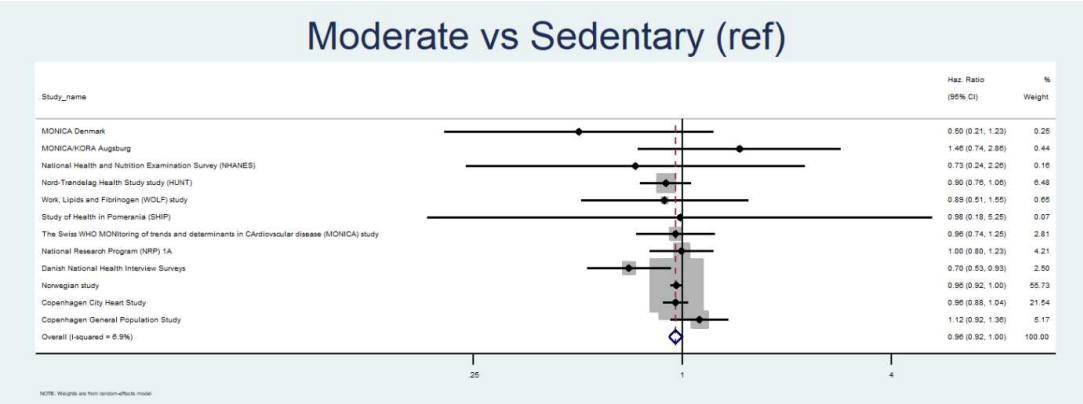

Forest plot showing the association of high versus sedentary occupational physical activity with all-cause mortality among females from model 3 (adjusted for leisure-time physical activity, age, BMI, smoking and education level).

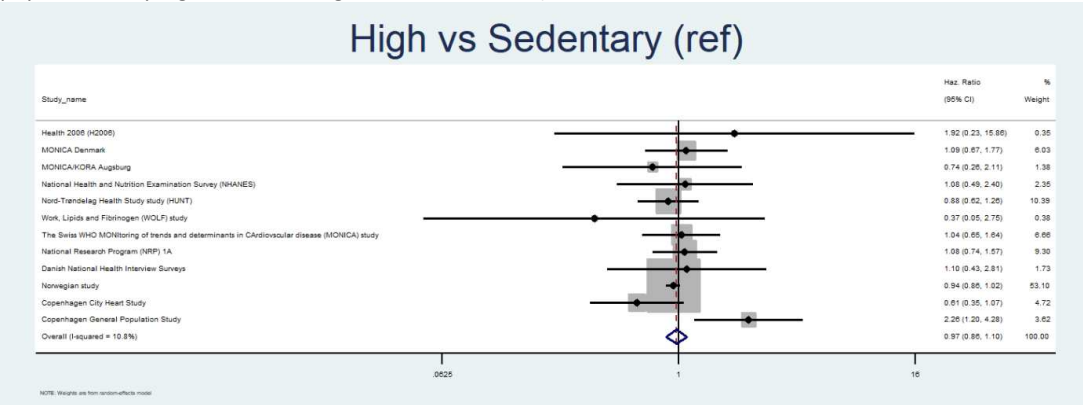

Forest plot showing the association of low versus sedentary leisure-time physical activity with all-cause mortality among males from model 3 (adjusted for occupational physical activity, age, BMI, smoking and education level).

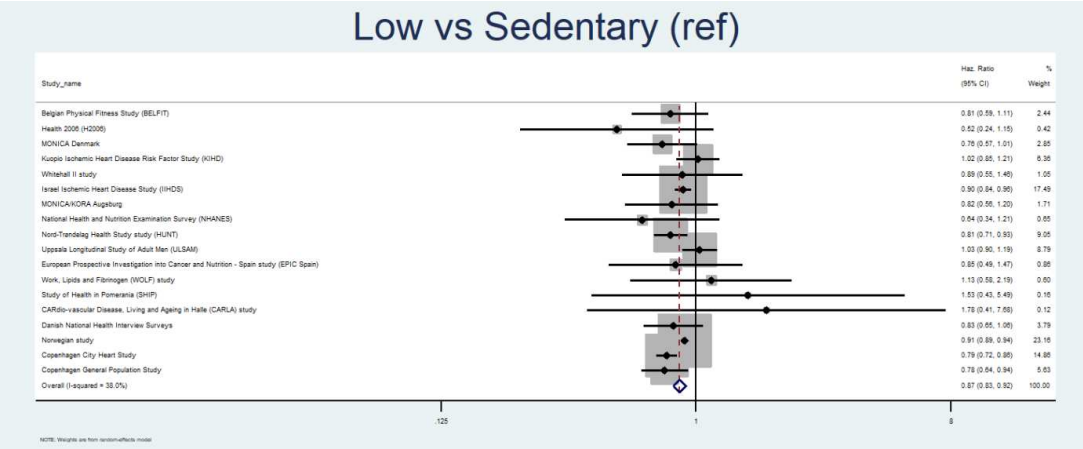

Forest plot showing the association of moderate versus sedentary leisure-time physical activity with all-cause mortality among males from model 3 (adjusted for occupational physical activity, age, BMI, smoking and education level).

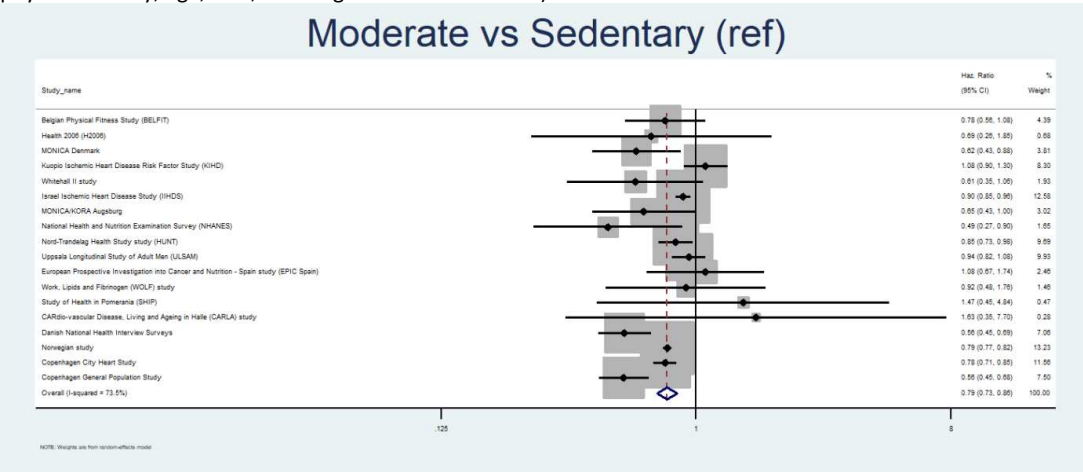

Forest plot showing the association of high versus sedentary leisure-time physical activity with all-cause mortality among males from model 3 (adjusted for occupational physical activity, age, BMI, smoking and education level).

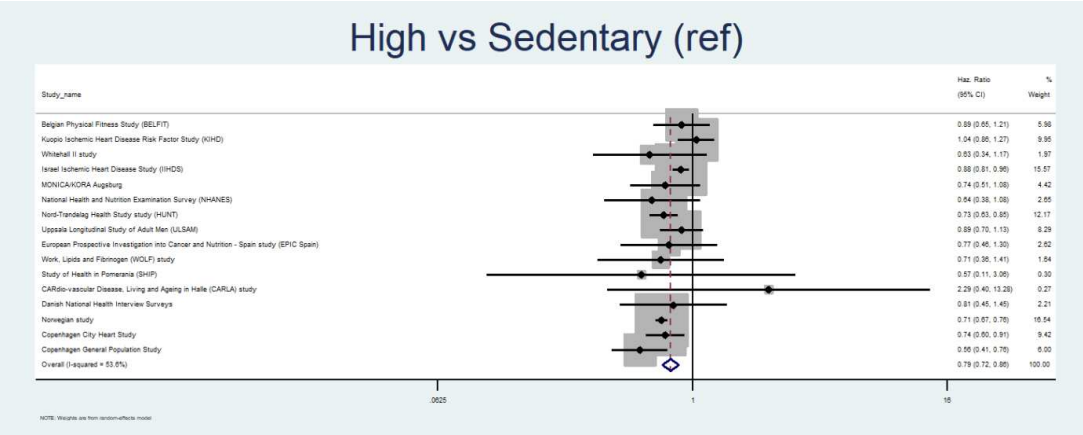

Forest plot showing the association of low versus sedentary leisure-time physical activity with all-cause mortality among females from model 3 (adjusted for occupational physical activity, age, BMI, smoking and education level).

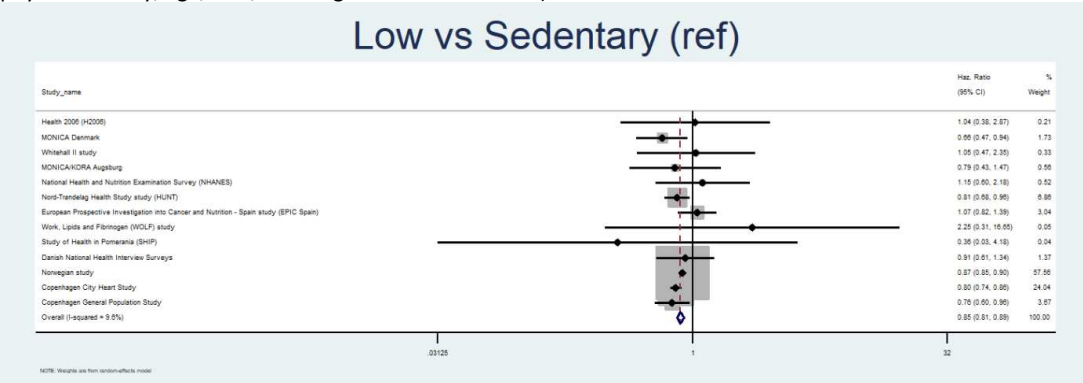

Forest plot showing the association of moderate versus sedentary leisure-time physical activity with all-cause mortality among females from model 3 (adjusted for occupational physical activity, age, BMI, smoking and education level).

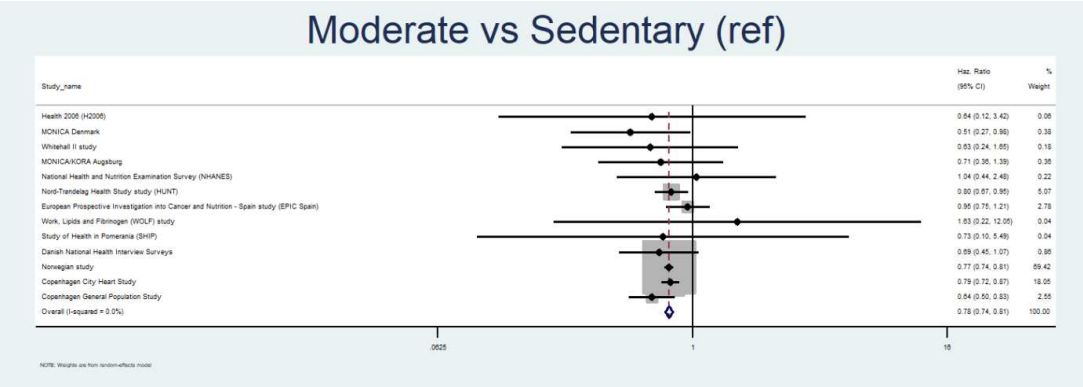

Forest plot showing the association of high versus sedentary leisure-time physical activity with all-cause mortality among females from model 3 (adjusted for occupational physical activity, age, BMI, smoking and education level).

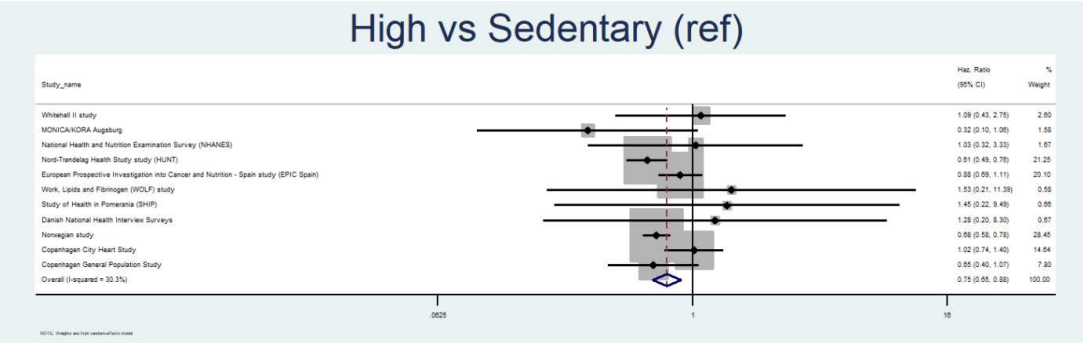

Supplement: inline-supplementary-material-9 [file inline-supplementary-material-9.pdf]
