# Supplementary material
Source: HighWire-hosted journal article supplement (https://bjsm.bmj.com/content/58/24/1527)
Supplement: inline-supplementary-material-1 [file inline-supplementary-material-1.pdf]

Appendix 1. Overview of all variables that were requested from eligible studies.

| Variable group       | Variables                                                                                                                                                                                                                                                                                                                                                                                                                  |
|----------------------|----------------------------------------------------------------------------------------------------------------------------------------------------------------------------------------------------------------------------------------------------------------------------------------------------------------------------------------------------------------------------------------------------------------------------|
| Predicting variables | <ul style="list-style-type: none"><li>• Occupational physical activity</li><li>• Leisure-time physical activity</li></ul>                                                                                                                                                                                                                                                                                                  |
| Socioeconomic status | <ul style="list-style-type: none"><li>• Education level</li><li>• Occupational class</li><li>• Income</li></ul>                                                                                                                                                                                                                                                                                                            |
| Primary outcomes     | <ul style="list-style-type: none"><li>• All-cause mortality</li></ul>                                                                                                                                                                                                                                                                                                                                                      |
| Secondary outcomes   | <ul style="list-style-type: none"><li>• Cardiovascular mortality</li><li>• Cardiovascular diseases in general</li><li>• Specific cardiovascular diseases (e.g., ischaemic heart disease, myocardial infarction or stroke)</li></ul>                                                                                                                                                                                        |
| Health status        | <ul style="list-style-type: none"><li>• Adiposity (e.g., BMI, waist circumference or fat percentage)</li><li>• Blood pressure (systolic and diastolic) and/or hypertension</li><li>• Blood lipids, cholesterol and/or glucose</li><li>• Cardiorespiratory fitness</li><li>• Self-reported health</li><li>• Other non-communicable diseases (e.g., diabetes, cancer, pulmonary diseases, mental health condition)</li></ul> |
| Other factors        |                                                                                                                                                                                                                                                                                                                                                                                                                            |
| Demographic factors  | <ul style="list-style-type: none"><li>• Gender</li><li>• Age</li><li>• Ethnicity</li><li>• Marital status</li></ul>                                                                                                                                                                                                                                                                                                        |
| Lifestyle factors    | <ul style="list-style-type: none"><li>• Smoking</li><li>• Alcohol use</li><li>• Diet (e.g., consumption of fruit and vegetables, sweets, snacks and sugary drinks)</li><li>• Sleep duration/quality</li><li>• Coffee use</li><li>• Other (e.g., transport and/or household) domains of physical activity</li></ul>                                                                                                         |
| Psychosocial factors | <ul style="list-style-type: none"><li>• Stress</li><li>• Social support</li><li>• Psychosocial work demands (e.g., decision authority, effort-rewards imbalance, job strain)</li></ul>                                                                                                                                                                                                                                     |
| Material factors     | <ul style="list-style-type: none"><li>• Health care utilisation</li><li>• Medication use</li><li>• Neighbourhood conditions</li></ul>                                                                                                                                                                                                                                                                                      |
