# Supplementary material
Source: HighWire-hosted journal article supplement (https://bjsm.bmj.com/content/58/24/1527)
Supplement: inline-supplementary-material-8 [file inline-supplementary-material-8.pdf]

Appendix 8. Association of occupational and leisure-time physical activity with all-cause mortality, with low physical activity as the reference category.

The association of occupational physical activity (left panels) and leisure-time physical activity (right panels) with all-cause mortality in males, using low physical activity as the reference category.

|                      | Occupational physical activity |    |                  | Leisure-time physical activity |    |                  |
|----------------------|--------------------------------|----|------------------|--------------------------------|----|------------------|
| Model 1 <sup>1</sup> | n                              | N  | HR [95% CI]      | n                              | N  | HR [95% CI]      |
| Sedentary            | 121,424                        | 18 | 0.89 [0.85-0.93] | 64,306                         | 19 | 1.23 [1.18-1.30] |
| Low                  | 87,322                         | 20 | 1.00 (reference) | 132,592                        | 22 | 1.00 (reference) |
| Moderate             | 66,687                         | 19 | 1.06 [1.01-1.12] | 94,012                         | 22 | 0.81 [0.74-0.89] |
| High                 | 41,782                         | 19 | 1.17 [1.08-1.28] | 29,559                         | 20 | 0.64 [0.52-0.79] |
| Model 2 <sup>2</sup> |                                |    |                  |                                |    |                  |
| Sedentary            | 118,500                        | 18 | 0.93 [0.91-0.95] | 63,534                         | 19 | 1.15 [1.10-1.20] |
| Low                  | 86,734                         | 20 | 1.00 (reference) | 131,375                        | 22 | 1.00 (reference) |
| Moderate             | 66,095                         | 19 | 1.09 [1.07-1.12] | 93,334                         | 22 | 0.89 [0.84-0.94] |
| High                 | 41,590                         | 19 | 1.13 [1.07-1.20] | 29,159                         | 20 | 0.87 [0.81-0.93] |
| Model 3 <sup>3</sup> |                                |    |                  |                                |    |                  |
| Sedentary            | 115,367                        | 17 | 0.99 [0.97-1.01] | 61,375                         | 18 | 1.14 [1.09-1.20] |
| Low                  | 83,215                         | 19 | 1.00 (reference) | 126,414                        | 21 | 1.00 (reference) |
| Moderate             | 63,869                         | 18 | 1.02 [0.99-1.04] | 91,450                         | 21 | 0.90 [0.85-0.95] |
| High                 | 39,474                         | 18 | 1.06 [0.99-1.13] | 28,122                         | 19 | 0.87 [0.81-0.92] |

n = number of participants; N = number of studies; HR = hazard ratio; 95% CI = 95% confidence interval.  
Note that the number of studies (N) differs across comparisons, as not all occupational and leisure-time physical activity categories were available from all studies (see Appendix 2 for an overview).  
<sup>1</sup> Model 1: Unadjusted model  
<sup>2</sup> Model 2: Adjusted for the other domain of physical activity, body mass index, age and smoking  
<sup>3</sup> Model 3: Additionally adjusted for education level  
Physical activity levels (during work and at leisure time) reflect the physical activity continuum, i.e., sedentary, low, moderate, and high. For occupational physical activity, categories roughly indicate: mainly sitting work (sedentary), work that mainly involves standing or walking, but without lifting or carrying loads (low), work that involves carrying light objects or walking stairs (moderate), physically demanding work involving frequent carrying or lifting heavy loads (high). For leisure-time physical activity these categories roughly indicate: almost no regular physical activity, spending most leisure time sitting (sedentary), occasionally engaging in leisure time activities such as slow walking or household activities (low), engaging in activities such as intense household activities or brisk walking (moderate), regular engagement in activities such as jogging or cycling (high).

Association of occupational physical activity (left panels) and leisure-time physical activity (right panels) with all-cause mortality in females, using low physical activity as the reference category.

|                      | Occupational physical activity |    |                  | Leisure-time physical activity |    |                  |
|----------------------|--------------------------------|----|------------------|--------------------------------|----|------------------|
| Model 1 <sup>1</sup> | n                              | N  | HR [95% CI]      | n                              | N  | HR [95% CI]      |
| Sedentary            | 93,528                         | 13 | 0.90 [0.83-0.97] | 58,946                         | 13 | 1.36 [1.14-1.63] |
| Low                  | 140,101                        | 14 | 1.00 (reference) | 172,135                        | 15 | 1.00 (reference) |
| Moderate             | 61,377                         | 11 | 0.89 [0.75-1.05] | 63,244                         | 15 | 0.78 [0.71-0.85] |
| High                 | 12,829                         | 11 | 1.32 [1.06-1.65] | 17,313                         | 13 | 0.60 [0.52-0.70] |
| Model 2 <sup>2</sup> |                                |    |                  |                                |    |                  |
| Sedentary            | 90,773                         | 13 | 0.99 [0.93-1.06] | 58,110                         | 13 | 1.20 [1.13-1.28] |
| Low                  | 139,029                        | 14 | 1.00 (reference) | 170,064                        | 15 | 1.00 (reference) |
| Moderate             | 60,456                         | 11 | 0.98 [0.95-1.01] | 62,467                         | 15 | 0.88 [0.82-0.94] |
| High                 | 12,258                         | 11 | 1.06 [0.93-1.20] | 17,014                         | 13 | 0.82 [0.73-0.93] |
| Model 3 <sup>3</sup> |                                |    |                  |                                |    |                  |
| Sedentary            | 89,512                         | 13 | 1.02 [0.96-1.09] | 57,812                         | 13 | 1.18 [1.13-1.24] |
| Low                  | 137,691                        | 14 | 1.00 (reference) | 169,189                        | 15 | 1.00 (reference) |
| Moderate             | 59,244                         | 11 | 0.96 [0.93-0.99] | 61,433                         | 15 | 0.91 [0.88-0.94] |
| High                 | 12,158                         | 11 | 1.00 [0.88-1.14] | 15,849                         | 13 | 0.85 [0.75-0.95] |

n = number of participants; N = number of studies; HR = hazard ratio; 95% CI = 95% confidence interval.  
Note that the number of studies (N) differs across comparisons, as not all occupational and leisure-time physical activity categories were available from all studies (see Appendix 2 for an overview).  
<sup>1</sup> Model 1: Unadjusted model  
<sup>2</sup> Model 2: Adjusted for the other domain of physical activity, body mass index, age and smoking  
<sup>3</sup> Model 3: Additionally adjusted for education level  
Physical activity levels (during work and at leisure time) reflect the physical activity continuum, i.e., sedentary, low, moderate, and high. For occupational physical activity, categories roughly indicate: mainly sitting work (sedentary), work that mainly involves standing or walking, but without lifting or carrying loads (low), work that involves carrying light objects or walking stairs (moderate), physically demanding work involving frequent carrying or lifting heavy loads (high). For leisure-time physical activity these categories roughly indicate: almost no regular physical activity, spending most leisure time sitting (sedentary), occasionally engaging in leisure time activities such as slow walking or household activities (low), engaging in activities such as intense household activities or brisk walking (moderate), regular engagement in activities such as jogging or cycling (high).
