# Supplementary material
Source: HighWire-hosted journal article supplement (https://bjsm.bmj.com/content/58/24/1527)
Supplement: inline-supplementary-material-11 [file inline-supplementary-material-11.pdf]

Appendix 11. Sensitivity analysis showing the association of occupational physical activity (OPA) and leisure-time physical activity (LTPA) with all-cause mortality, stratified by education level.

The association of occupational physical activity (OPA) with all-cause mortality among males. Models with either the sedentary (left columns) and low OPA category (right column) as reference are shown.

|                                                                                                                                                                                                                                                                                                                                                                                                                                                 |               | n      | N  | HR [95% CI]      | n      | N  | HR [95% CI]      |
|-------------------------------------------------------------------------------------------------------------------------------------------------------------------------------------------------------------------------------------------------------------------------------------------------------------------------------------------------------------------------------------------------------------------------------------------------|---------------|--------|----|------------------|--------|----|------------------|
| Low education level                                                                                                                                                                                                                                                                                                                                                                                                                             | Sedentary OPA | 28,868 | 15 | 1.00 (reference) | 28,774 | 14 | 1.01 [0.97-1.05] |
|                                                                                                                                                                                                                                                                                                                                                                                                                                                 | Low OPA       | 24,255 | 14 | 0.99 [0.95-1.03] | 24,255 | 15 | 1.00 (reference) |
|                                                                                                                                                                                                                                                                                                                                                                                                                                                 | Moderate OPA  | 24,735 | 15 | 0.99 [0.94-1.04] | 24,446 | 15 | 0.99 [0.95-1.02] |
|                                                                                                                                                                                                                                                                                                                                                                                                                                                 | High OPA      | 15,952 | 14 | 1.02 [0.93-1.13] | 15,800 | 14 | 1.00 [0.96-1.04] |
| Moderate education level                                                                                                                                                                                                                                                                                                                                                                                                                        | Sedentary OPA | 63,824 | 16 | 1.00 (reference) | 63,455 | 15 | 0.99 [0.96-1.03] |
|                                                                                                                                                                                                                                                                                                                                                                                                                                                 | Low OPA       | 47,536 | 15 | 1.01 [0.97-1.04] | 48,802 | 17 | 1.00 (reference) |
|                                                                                                                                                                                                                                                                                                                                                                                                                                                 | Moderate OPA  | 41,502 | 16 | 1.11 [1.02-1.20] | 41,687 | 17 | 1.04 [1.01-1.08] |
|                                                                                                                                                                                                                                                                                                                                                                                                                                                 | High OPA      | 22,947 | 14 | 1.19 [1.02-1.37] | 23,293 | 16 | 1.08 [0.95-1.22] |
| High education level                                                                                                                                                                                                                                                                                                                                                                                                                            | Sedentary OPA | 54,543 | 8  | 1.00 (reference) | 55,033 | 7  | 0.95 [0.90-1.00] |
|                                                                                                                                                                                                                                                                                                                                                                                                                                                 | Low OPA       | 26,333 | 7  | 1.06 [1.00-1.12] | 27,164 | 9  | 1.00 (reference) |
|                                                                                                                                                                                                                                                                                                                                                                                                                                                 | Moderate OPA  | 10,560 | 8  | 1.10 [0.92-1.31] | 10,289 | 8  | 1.07 [0.90-1.28] |
|                                                                                                                                                                                                                                                                                                                                                                                                                                                 | High OPA      | 4,793  | 7  | 1.12 [0.96-1.32] | 5,399  | 8  | 1.08 [0.91-1.27] |
| n = number of participants; N = number of studies; HR = hazard ratio; 95% CI = 95% confidence interval; OPA = occupational physical activity                                                                                                                                                                                                                                                                                                    |               |        |    |                  |        |    |                  |
| Note that the number of studies (N) differs across comparisons, as not all occupational physical activity categories were available from all studies (see Appendix 2 for an overview).                                                                                                                                                                                                                                                          |               |        |    |                  |        |    |                  |
| Estimates are from model 2: Adjusted for leisure-time physical activity, age, body mass index and smoking.                                                                                                                                                                                                                                                                                                                                      |               |        |    |                  |        |    |                  |
| Occupational physical activity levels reflect the physical activity continuum, i.e., sedentary, low, moderate, and high. Categories roughly indicate: mainly sitting work (sedentary), work that mainly involves standing or walking, but without lifting or carrying loads (low), work that involves carrying light objects or walking stairs (moderate), physically demanding work involving frequent carrying or lifting heavy loads (high). |               |        |    |                  |        |    |                  |
| Education levels reflect low (pre-primary/primary/lower secondary), moderate (upper secondary), and high (post-secondary) education, using the International Standard Classification of Education (ISCED-97).                                                                                                                                                                                                                                   |               |        |    |                  |        |    |                  |

The association of occupational physical activity (OPA) with all-cause mortality among females. Models with either the sedentary (left columns) and low OPA category (right column) as reference are shown.

|                                                                                                                                                                                                                                                                                                                                                                                                                                                                                                                                                                                                                                                                                                                                                                                                                                                                                                                            |               | n      | N  | HR [95% CI]      | n      | N  | HR [95% CI]      |
|----------------------------------------------------------------------------------------------------------------------------------------------------------------------------------------------------------------------------------------------------------------------------------------------------------------------------------------------------------------------------------------------------------------------------------------------------------------------------------------------------------------------------------------------------------------------------------------------------------------------------------------------------------------------------------------------------------------------------------------------------------------------------------------------------------------------------------------------------------------------------------------------------------------------------|---------------|--------|----|------------------|--------|----|------------------|
| Low education level                                                                                                                                                                                                                                                                                                                                                                                                                                                                                                                                                                                                                                                                                                                                                                                                                                                                                                        | Sedentary OPA | 25,563 | 10 | 1.00 (reference) | 25,117 | 9  | 1.08 [1.00-1.16] |
|                                                                                                                                                                                                                                                                                                                                                                                                                                                                                                                                                                                                                                                                                                                                                                                                                                                                                                                            | Low OPA       | 48,980 | 9  | 0.93 [0.87-1.00] | 48,964 | 10 | 1.00 (reference) |
|                                                                                                                                                                                                                                                                                                                                                                                                                                                                                                                                                                                                                                                                                                                                                                                                                                                                                                                            | Moderate OPA  | 22,547 | 10 | 0.87 [0.79-0.97] | 22,264 | 9  | 0.94 [0.90-0.98] |
|                                                                                                                                                                                                                                                                                                                                                                                                                                                                                                                                                                                                                                                                                                                                                                                                                                                                                                                            | High OPA      | 7,011  | 9  | 0.93 [0.77-1.14] | 6,928  | 9  | 1.08 [0.88-1.32] |
|                                                                                                                                                                                                                                                                                                                                                                                                                                                                                                                                                                                                                                                                                                                                                                                                                                                                                                                            |               |        |    |                  |        |    |                  |
| Moderate education level                                                                                                                                                                                                                                                                                                                                                                                                                                                                                                                                                                                                                                                                                                                                                                                                                                                                                                   | Sedentary OPA | 61,277 | 13 | 1.00 (reference) | 60,188 | 12 | 1.00 [0.89-1.12] |
|                                                                                                                                                                                                                                                                                                                                                                                                                                                                                                                                                                                                                                                                                                                                                                                                                                                                                                                            | Low OPA       | 75,131 | 12 | 1.00 [0.89-1.12] | 74,887 | 13 | 1.00 (reference) |
|                                                                                                                                                                                                                                                                                                                                                                                                                                                                                                                                                                                                                                                                                                                                                                                                                                                                                                                            | Moderate OPA  | 38,337 | 12 | 0.92 [0.79-1.07] | 37,941 | 11 | 0.95 [0.91-0.99] |
|                                                                                                                                                                                                                                                                                                                                                                                                                                                                                                                                                                                                                                                                                                                                                                                                                                                                                                                            | High OPA      | 4,928  | 8  | 1.15 [0.85-1.56] | 4,617  | 8  | 1.02 [0.85-1.23] |
|                                                                                                                                                                                                                                                                                                                                                                                                                                                                                                                                                                                                                                                                                                                                                                                                                                                                                                                            |               |        |    |                  |        |    |                  |
| High education level                                                                                                                                                                                                                                                                                                                                                                                                                                                                                                                                                                                                                                                                                                                                                                                                                                                                                                       | Sedentary OPA | 39,214 | 10 | 1.00 (reference) | 38,363 | 8  | 1.06 [0.98-1.14] |
|                                                                                                                                                                                                                                                                                                                                                                                                                                                                                                                                                                                                                                                                                                                                                                                                                                                                                                                            | Low OPA       | 47,942 | 8  | 0.95 [0.88-1.02] | 47,798 | 9  | 1.00 (reference) |
|                                                                                                                                                                                                                                                                                                                                                                                                                                                                                                                                                                                                                                                                                                                                                                                                                                                                                                                            | Moderate OPA  | 20,344 | 8  | 1.04 [0.94-1.15] | 20,111 | 7  | 1.11 [1.01-1.22] |
|                                                                                                                                                                                                                                                                                                                                                                                                                                                                                                                                                                                                                                                                                                                                                                                                                                                                                                                            | High OPA      | 1,099  | 6  | 1.18 [0.85-1.64] | 1,070  | 6  | 1.16 [0.87-1.54] |
| <p>n = number of participants; N = number of studies; HR = hazard ratio; 95% CI = 95% confidence interval; OPA = occupational physical activity</p> <p>Note that the number of studies (N) differs across comparisons, as not all occupational physical activity categories were available from all studies (see Appendix 2 for an overview).</p> <p>Estimates are from model 2: Adjusted for leisure-time physical activity, age, body mass index and smoking.</p> <p>Occupational physical activity levels reflect the physical activity continuum, i.e., sedentary, low, moderate, and high. Categories roughly indicate: mainly sitting work (sedentary), work that mainly involves standing or walking, but without lifting or carrying loads (low), work that involves carrying light objects or walking stairs (moderate), physically demanding work involving frequent carrying or lifting heavy loads (high).</p> |               |        |    |                  |        |    |                  |

The association of leisure-time physical activity (LTPA) with all-cause mortality among males. Models with either the sedentary (left columns) and low LTPA category (right column) as reference are shown.

|                                                                                                                                                                                                                                                                                                                                                                                                                                                                                                                                                                                                                                                                                                                                                                                                                                                                                                                                                                                          |                | n      | N  | HR [95% CI]      | n      | N  | HR [95% CI]      |
|------------------------------------------------------------------------------------------------------------------------------------------------------------------------------------------------------------------------------------------------------------------------------------------------------------------------------------------------------------------------------------------------------------------------------------------------------------------------------------------------------------------------------------------------------------------------------------------------------------------------------------------------------------------------------------------------------------------------------------------------------------------------------------------------------------------------------------------------------------------------------------------------------------------------------------------------------------------------------------------|----------------|--------|----|------------------|--------|----|------------------|
| Low education level                                                                                                                                                                                                                                                                                                                                                                                                                                                                                                                                                                                                                                                                                                                                                                                                                                                                                                                                                                      | Sedentary LTPA | 18,231 | 16 | 1.00 (reference) | 18,231 | 16 | 1.11 [1.03-1.2]  |
|                                                                                                                                                                                                                                                                                                                                                                                                                                                                                                                                                                                                                                                                                                                                                                                                                                                                                                                                                                                          | Low LTPA       | 37,868 | 16 | 0.90 [0.84-0.97] | 38,948 | 19 | 1.00 (reference) |
|                                                                                                                                                                                                                                                                                                                                                                                                                                                                                                                                                                                                                                                                                                                                                                                                                                                                                                                                                                                          | Moderate LTPA  | 28,476 | 16 | 0.84 [0.77-0.92] | 31,266 | 19 | 0.89 [0.84-0.95] |
|                                                                                                                                                                                                                                                                                                                                                                                                                                                                                                                                                                                                                                                                                                                                                                                                                                                                                                                                                                                          | High LTPA      | 7,823  | 13 | 0.83 [0.72-0.94] | 8,179  | 16 | 0.88 [0.78-0.99] |
|                                                                                                                                                                                                                                                                                                                                                                                                                                                                                                                                                                                                                                                                                                                                                                                                                                                                                                                                                                                          |                | n      | N  | HR [95% CI]      | n      | N  | HR [95% CI]      |
| Moderate education level                                                                                                                                                                                                                                                                                                                                                                                                                                                                                                                                                                                                                                                                                                                                                                                                                                                                                                                                                                 | Sedentary LTPA | 34,650 | 18 | 1.00 (reference) | 34,206 | 18 | 1.16 [1.09-1.24] |
|                                                                                                                                                                                                                                                                                                                                                                                                                                                                                                                                                                                                                                                                                                                                                                                                                                                                                                                                                                                          | Low LTPA       | 72,791 | 18 | 0.86 [0.81-0.92] | 73,824 | 21 | 1.00 (reference) |
|                                                                                                                                                                                                                                                                                                                                                                                                                                                                                                                                                                                                                                                                                                                                                                                                                                                                                                                                                                                          | Moderate LTPA  | 51,799 | 18 | 0.78 [0.71-0.87] | 54,551 | 21 | 0.90 [0.84-0.96] |
|                                                                                                                                                                                                                                                                                                                                                                                                                                                                                                                                                                                                                                                                                                                                                                                                                                                                                                                                                                                          | High LTPA      | 14,890 | 15 | 0.76 [0.65-0.89] | 15,126 | 18 | 0.84 [0.77-0.92] |
|                                                                                                                                                                                                                                                                                                                                                                                                                                                                                                                                                                                                                                                                                                                                                                                                                                                                                                                                                                                          |                | n      | N  | HR [95% CI]      | n      | N  | HR [95% CI]      |
| High education level                                                                                                                                                                                                                                                                                                                                                                                                                                                                                                                                                                                                                                                                                                                                                                                                                                                                                                                                                                     | Sedentary LTPA | 14,604 | 15 | 1.00 (reference) | 14,604 | 14 | 1.21 [1.09-1.34] |
|                                                                                                                                                                                                                                                                                                                                                                                                                                                                                                                                                                                                                                                                                                                                                                                                                                                                                                                                                                                          | Low LTPA       | 39,747 | 14 | 0.83 [0.75-0.91] | 40,655 | 19 | 1.00 (reference) |
|                                                                                                                                                                                                                                                                                                                                                                                                                                                                                                                                                                                                                                                                                                                                                                                                                                                                                                                                                                                          | Moderate LTPA  | 34,296 | 14 | 0.76 [0.66-0.87] | 36,506 | 19 | 0.94 [0.88-1.01] |
|                                                                                                                                                                                                                                                                                                                                                                                                                                                                                                                                                                                                                                                                                                                                                                                                                                                                                                                                                                                          | High LTPA      | 10,229 | 12 | 0.80 [0.72-0.90] | 11,375 | 17 | 0.94 [0.86-1.04] |
| <p>n = number of participants; N = number of studies; HR = hazard ratio; 95% CI = 95% confidence interval; LTPA = leisure-time physical activity</p> <p>Note that the number of studies (N) differs across comparisons, as not all leisure-time physical activity categories were available from all studies (see Appendix 2 for an overview).</p> <p>Estimates are from model 2: Adjusted for occupational physical activity, age, body mass index and smoking.</p> <p>Leisure-time physical activity levels reflect the physical activity continuum, i.e., sedentary, low, moderate, and high. Categories roughly indicate: almost no regular physical activity, spending most leisure time sitting (sedentary), occasionally engaging in leisure time activities such as slow walking or household activities (low), engaging in activities such as intense household activities or brisk walking (moderate), regular engagement in activities such as jogging or cycling (high).</p> |                |        |    |                  |        |    |                  |

The association of leisure-time physical activity (LTPA) with all-cause mortality among females. Models with either the sedentary (left columns) and low LTPA category (right column) as reference are shown.

|                                                                                                                                                                                                                                                                                                                                                                                                                                                                                                                                                                                                                                                                                                                                                                                                                                                                                                                                                                                          |                | n      | N  | HR [95% CI]      | n       | N  | HR [95% CI]      |
|------------------------------------------------------------------------------------------------------------------------------------------------------------------------------------------------------------------------------------------------------------------------------------------------------------------------------------------------------------------------------------------------------------------------------------------------------------------------------------------------------------------------------------------------------------------------------------------------------------------------------------------------------------------------------------------------------------------------------------------------------------------------------------------------------------------------------------------------------------------------------------------------------------------------------------------------------------------------------------------|----------------|--------|----|------------------|---------|----|------------------|
| Low education level                                                                                                                                                                                                                                                                                                                                                                                                                                                                                                                                                                                                                                                                                                                                                                                                                                                                                                                                                                      | Sedentary LTPA | 17,488 | 10 | 1.00 (reference) | 17,488  | 10 | 1.13 [1.09-1.18] |
|                                                                                                                                                                                                                                                                                                                                                                                                                                                                                                                                                                                                                                                                                                                                                                                                                                                                                                                                                                                          | Low LTPA       | 53,584 | 10 | 0.88 [0.85-0.92] | 54,678  | 13 | 1.00 (reference) |
|                                                                                                                                                                                                                                                                                                                                                                                                                                                                                                                                                                                                                                                                                                                                                                                                                                                                                                                                                                                          | Moderate LTPA  | 25,570 | 10 | 0.80 [0.75-0.86] | 26,806  | 13 | 0.92 [0.87-0.98] |
|                                                                                                                                                                                                                                                                                                                                                                                                                                                                                                                                                                                                                                                                                                                                                                                                                                                                                                                                                                                          | High LTPA      | 4,790  | 8  | 0.82 [0.63-1.07] | 5,027   | 10 | 0.90 [0.70-1.16] |
|                                                                                                                                                                                                                                                                                                                                                                                                                                                                                                                                                                                                                                                                                                                                                                                                                                                                                                                                                                                          |                | n      | N  | HR [95% CI]      | n       | N  | HR [95% CI]      |
| Moderate education level                                                                                                                                                                                                                                                                                                                                                                                                                                                                                                                                                                                                                                                                                                                                                                                                                                                                                                                                                                 | Sedentary LTPA | 33,051 | 13 | 1.00 (reference) | 33,051  | 13 | 1.21 [1.16-1.25] |
|                                                                                                                                                                                                                                                                                                                                                                                                                                                                                                                                                                                                                                                                                                                                                                                                                                                                                                                                                                                          | Low LTPA       | 99,501 | 13 | 0.83 [0.80-0.86] | 100,279 | 15 | 1.00 (reference) |
|                                                                                                                                                                                                                                                                                                                                                                                                                                                                                                                                                                                                                                                                                                                                                                                                                                                                                                                                                                                          | Moderate LTPA  | 37,649 | 13 | 0.68 [0.58-0.79] | 39,065  | 15 | 0.89 [0.83-0.94] |
|                                                                                                                                                                                                                                                                                                                                                                                                                                                                                                                                                                                                                                                                                                                                                                                                                                                                                                                                                                                          | High LTPA      | 6,907  | 9  | 0.69 [0.57-0.83] | 7,143   | 11 | 0.77 [0.74-0.80] |
|                                                                                                                                                                                                                                                                                                                                                                                                                                                                                                                                                                                                                                                                                                                                                                                                                                                                                                                                                                                          |                | n      | N  | HR [95% CI]      | n       | N  | HR [95% CI]      |
| High education level                                                                                                                                                                                                                                                                                                                                                                                                                                                                                                                                                                                                                                                                                                                                                                                                                                                                                                                                                                     | Sedentary LTPA | 14,084 | 9  | 1.00 (reference) | 14,084  | 9  | 1.12 [1.03-1.22] |
|                                                                                                                                                                                                                                                                                                                                                                                                                                                                                                                                                                                                                                                                                                                                                                                                                                                                                                                                                                                          | Low LTPA       | 55,511 | 9  | 0.89 [0.82-0.97] | 55,955  | 12 | 1.00 (reference) |
|                                                                                                                                                                                                                                                                                                                                                                                                                                                                                                                                                                                                                                                                                                                                                                                                                                                                                                                                                                                          | Moderate LTPA  | 31,026 | 8  | 0.81 [0.72-0.91] | 32,059  | 11 | 0.95 [0.83-1.08] |
|                                                                                                                                                                                                                                                                                                                                                                                                                                                                                                                                                                                                                                                                                                                                                                                                                                                                                                                                                                                          | High LTPA      | 6,087  | 7  | 0.77 [0.61-0.96] | 6,746   | 9  | 0.85 [0.70-1.03] |
| <p>n = number of participants; N = number of studies; HR = hazard ratio; 95% CI = 95% confidence interval; LTPA = leisure-time physical activity</p> <p>Note that the number of studies (N) differs across comparisons, as not all leisure-time physical activity categories were available from all studies (see Appendix 2 for an overview).</p> <p>Estimates are from model 2: Adjusted for occupational physical activity, age, body mass index and smoking.</p> <p>Leisure-time physical activity levels reflect the physical activity continuum, i.e., sedentary, low, moderate, and high. Categories roughly indicate: almost no regular physical activity, spending most leisure time sitting (sedentary), occasionally engaging in leisure time activities such as slow walking or household activities (low), engaging in activities such as intense household activities or brisk walking (moderate), regular engagement in activities such as jogging or cycling (high).</p> |                |        |    |                  |         |    |                  |
