# Supplementary material
Source: HighWire-hosted journal article supplement (https://bjsm.bmj.com/content/58/24/1527)
Supplement: inline-supplementary-material-14 [file inline-supplementary-material-14.pdf]

Appendix 14. Leave one study out analyses, showing the minimum and maximum hazard ratios found when leaving either of the 22 individual studies out of the model. Models are shown for both the association of occupational physical activity (OPA) and leisure-time physical activity (LTPA) and all-cause mortality for males and females and are from model 3; i.e., adjusted for leisure-time physical activity, age, BMI, smoking and education level.

|                                                                                                                                                                                                                                                                                                                                                                                                                                                                                                                                                                                                                                                                                                                                                                                                                                                                                                                                                                                                                                                                                                     |                      |                | Males            | Females          |
|-----------------------------------------------------------------------------------------------------------------------------------------------------------------------------------------------------------------------------------------------------------------------------------------------------------------------------------------------------------------------------------------------------------------------------------------------------------------------------------------------------------------------------------------------------------------------------------------------------------------------------------------------------------------------------------------------------------------------------------------------------------------------------------------------------------------------------------------------------------------------------------------------------------------------------------------------------------------------------------------------------------------------------------------------------------------------------------------------------|----------------------|----------------|------------------|------------------|
|                                                                                                                                                                                                                                                                                                                                                                                                                                                                                                                                                                                                                                                                                                                                                                                                                                                                                                                                                                                                                                                                                                     |                      |                | HR [95% CI]      | HR [95% CI]      |
| Occupational physical activity                                                                                                                                                                                                                                                                                                                                                                                                                                                                                                                                                                                                                                                                                                                                                                                                                                                                                                                                                                                                                                                                      | Minimum effect sizes | Sedentary OPA  | 1.00 (reference) | 1.00 (reference) |
|                                                                                                                                                                                                                                                                                                                                                                                                                                                                                                                                                                                                                                                                                                                                                                                                                                                                                                                                                                                                                                                                                                     |                      | Low OPA        | 1.01 [0.99 1.03] | 0.95 [0.86 1.05] |
|                                                                                                                                                                                                                                                                                                                                                                                                                                                                                                                                                                                                                                                                                                                                                                                                                                                                                                                                                                                                                                                                                                     |                      | Moderate OPA   | 1.04 [1.00 1.08] | 0.95 [0.87 1.03] |
|                                                                                                                                                                                                                                                                                                                                                                                                                                                                                                                                                                                                                                                                                                                                                                                                                                                                                                                                                                                                                                                                                                     |                      | High OPA       | 1.07 [1.00 1.16] | 0.94 [0.87 1.02] |
|                                                                                                                                                                                                                                                                                                                                                                                                                                                                                                                                                                                                                                                                                                                                                                                                                                                                                                                                                                                                                                                                                                     | Maximum effect sizes | Sedentary OPA  | 1.00 (reference) | 1.00 (reference) |
|                                                                                                                                                                                                                                                                                                                                                                                                                                                                                                                                                                                                                                                                                                                                                                                                                                                                                                                                                                                                                                                                                                     |                      | Low OPA        | 1.03 [0.99 1.07] | 1.01 [0.98 1.03] |
|                                                                                                                                                                                                                                                                                                                                                                                                                                                                                                                                                                                                                                                                                                                                                                                                                                                                                                                                                                                                                                                                                                     |                      | Moderate OPA   | 1.07 [1.07 1.12] | 0.96 [0.93 1.00] |
|                                                                                                                                                                                                                                                                                                                                                                                                                                                                                                                                                                                                                                                                                                                                                                                                                                                                                                                                                                                                                                                                                                     |                      | High OPA       | 1.16 [1.05 1.27] | 1.02 [0.83 1.24] |
| Leisure-time physical activity                                                                                                                                                                                                                                                                                                                                                                                                                                                                                                                                                                                                                                                                                                                                                                                                                                                                                                                                                                                                                                                                      | Minimum effect sizes | Sedentary LTPA | 1.00 (reference) | 1.00 (reference) |
|                                                                                                                                                                                                                                                                                                                                                                                                                                                                                                                                                                                                                                                                                                                                                                                                                                                                                                                                                                                                                                                                                                     |                      | Low LTPA       | 0.86 [0.82 0.91] | 0.81 [0.76 0.87] |
|                                                                                                                                                                                                                                                                                                                                                                                                                                                                                                                                                                                                                                                                                                                                                                                                                                                                                                                                                                                                                                                                                                     |                      | Moderate LTPA  | 0.77 [0.71 0.84] | 0.77 [0.74 0.80] |
|                                                                                                                                                                                                                                                                                                                                                                                                                                                                                                                                                                                                                                                                                                                                                                                                                                                                                                                                                                                                                                                                                                     |                      | High LTPA      | 0.77 [0.70 0.83] | 0.71 [0.63 0.80] |
|                                                                                                                                                                                                                                                                                                                                                                                                                                                                                                                                                                                                                                                                                                                                                                                                                                                                                                                                                                                                                                                                                                     | Maximum effect sizes | Sedentary LTPA | 1.00 (reference) | 1.00 (reference) |
|                                                                                                                                                                                                                                                                                                                                                                                                                                                                                                                                                                                                                                                                                                                                                                                                                                                                                                                                                                                                                                                                                                     |                      | Low LTPA       | 0.90 [0.87 0.93] | 0.87 [0.84 0.89] |
|                                                                                                                                                                                                                                                                                                                                                                                                                                                                                                                                                                                                                                                                                                                                                                                                                                                                                                                                                                                                                                                                                                     |                      | Moderate LTPA  | 0.82 [0.75 0.88] | 0.78 [0.73 0.84] |
|                                                                                                                                                                                                                                                                                                                                                                                                                                                                                                                                                                                                                                                                                                                                                                                                                                                                                                                                                                                                                                                                                                     |                      | High LTPA      | 0.81 [0.73 0.88] | 0.80 [0.67 0.94] |
| HR = hazard ratio; 95% CI = 95% confidence interval; OPA = Occupational physical activity; LTPA = Leisure-time physical activity<br>Occupational physical activity levels reflect the physical activity continuum, i.e., sedentary, low, moderate, and high. Categories roughly indicate: mainly sitting work (sedentary), work that mainly involves standing or walking, but without lifting or carrying loads (low), work that involves carrying light objects or walking stairs (moderate), physically demanding work involving frequent carrying or lifting heavy loads (high).<br>Leisure-time physical activity levels reflect the physical activity continuum, i.e., sedentary, low, moderate, and high. Categories roughly indicate: almost no regular physical activity, spending most leisure time sitting (sedentary), occasionally engaging in leisure time activities such as slow walking or household activities (low), engaging in activities such as intense household activities or brisk walking (moderate), regular engagement in activities such as jogging or cycling (high). |                      |                |                  |                  |
