# Supplementary material
Source: HighWire-hosted journal article supplement (https://bjsm.bmj.com/content/58/24/1527)
Supplement: inline-supplementary-material-15 [file inline-supplementary-material-15.pdf]

Appendix 15. Sensitivity analysis showing the association of occupational and leisure-time physical activity with all-cause mortality for studies with baseline assessment of physical activity in 1989 or earlier versus in 1990 or later. Models are shown for males and females and are from model 3; i.e., adjusted for leisure-time physical activity, age, BMI, smoking and education level.

|                                                                                                                                                                                                                                                                                                                                                                                                                                                                                                                                                                                                                                                                                                                                                               |                 |               | Males  |    |                  | Females |   |                  |
|---------------------------------------------------------------------------------------------------------------------------------------------------------------------------------------------------------------------------------------------------------------------------------------------------------------------------------------------------------------------------------------------------------------------------------------------------------------------------------------------------------------------------------------------------------------------------------------------------------------------------------------------------------------------------------------------------------------------------------------------------------------|-----------------|---------------|--------|----|------------------|---------|---|------------------|
|                                                                                                                                                                                                                                                                                                                                                                                                                                                                                                                                                                                                                                                                                                                                                               |                 |               | n      | N  | HR [95% CI]      | n       | N | HR [95% CI]      |
| Year of baseline assessment                                                                                                                                                                                                                                                                                                                                                                                                                                                                                                                                                                                                                                                                                                                                   | 1989 or earlier | Sedentary OPA | 90,317 | 11 | 1.00 (reference) | 67,273  | 7 | 1.00 (reference) |
|                                                                                                                                                                                                                                                                                                                                                                                                                                                                                                                                                                                                                                                                                                                                                               |                 | Low OPA       | 64,011 | 10 | 1.01 [0.90-1.14] | 111,549 | 6 | 1.05 [0.94-1.17] |
|                                                                                                                                                                                                                                                                                                                                                                                                                                                                                                                                                                                                                                                                                                                                                               |                 | Moderate OPA  | 50,249 | 11 | 1.12 [0.93-1.35] | 44,957  | 7 | 0.98 [0.87-1.11] |
|                                                                                                                                                                                                                                                                                                                                                                                                                                                                                                                                                                                                                                                                                                                                                               |                 | High OPA      | 29,513 | 10 | 1.14 [0.88-1.47] | 5,305   | 7 | 1.19 [0.71-1.99] |
|                                                                                                                                                                                                                                                                                                                                                                                                                                                                                                                                                                                                                                                                                                                                                               | 1990 or later   | Sedentary OPA | 25,999 | 7  | 1.00 (reference) | 24,942  | 7 | 1.00 (reference) |
|                                                                                                                                                                                                                                                                                                                                                                                                                                                                                                                                                                                                                                                                                                                                                               |                 | Low OPA       | 15,946 | 7  | 1.01 [0.99-1.04] | 23,605  | 7 | 0.95 [0.87-1.03] |
|                                                                                                                                                                                                                                                                                                                                                                                                                                                                                                                                                                                                                                                                                                                                                               |                 | Moderate OPA  | 12,315 | 7  | 1.04 [1.00-1.07] | 15,525  | 5 | 0.95 [0.89-1.01] |
|                                                                                                                                                                                                                                                                                                                                                                                                                                                                                                                                                                                                                                                                                                                                                               |                 | High OPA      | 7,784  | 7  | 1.14 [1.02-1.26] | 1,207   | 5 | 0.94 [0.87-1.02] |
| N = number of studies; HR = hazard ratio; 95% CI = 95% confidence interval; OPA = Occupational physical activity<br>Note that the number of studies (N) differs across comparisons, as not all occupational physical activity categories were available from all studies (see Appendix 4 for an overview).<br>Occupational physical activity levels reflect the physical activity continuum, i.e., sedentary, low, moderate, and high. Categories roughly indicate: mainly sitting work (sedentary), work that mainly involves standing or walking, but without lifting or carrying loads (low), work that involves carrying light objects or walking stairs (moderate), physically demanding work involving frequent carrying or lifting heavy loads (high). |                 |               |        |    |                  |         |   |                  |
